# Supplementary material for: Targeted Theranostic Approach for Glioma Using Dendrimer-Based Curcumin Nanoparticle
Source: PubMed Central journal article supplement — J Nanomed Nanotechnol. Author manuscript; Available in PMC 2016 Oct 1. (PMC5040461; doi:10.4172/2157-7439.1000393), 2016-08-12
Supplement: NIHMS817886-supplement-Supple.pdf [file NIHMS817886-supplement-Supple.pdf]

# Targeted Theranostic Approach for Glioma Using Dendrimer-Based Curcumin Nanoparticle

Nipuni-Dhanesha H. Gamage<sup>[a]</sup>, Maria J. Worsham<sup>[a]</sup> and Meser M. Ali<sup>\*[a]</sup>

Supplementary materials:

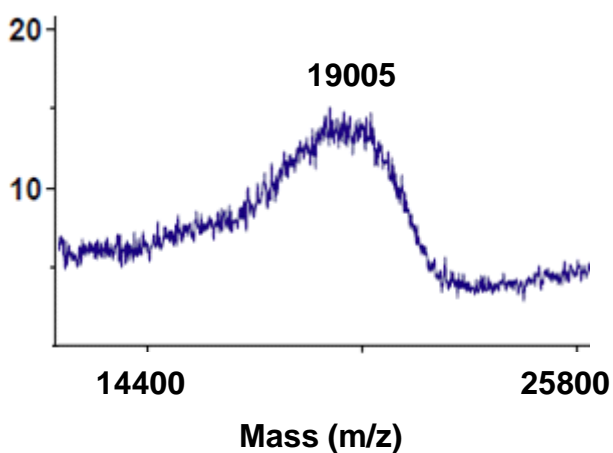

**Figure S1:** MALDI-TOF spectrum for molecular weight determination of **G3-(Curc)<sub>24</sub>**. The average number of **Curc** conjugated with G3-succinamic acid dendrimer was estimated to be 24 per dendrimer.

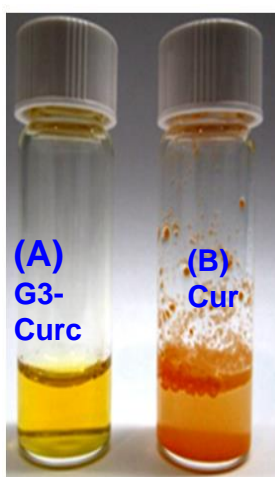

**Figure S2:** Solubility of **G3-(Curc)<sub>24</sub>** (A) and free **Curc** (B) in water.

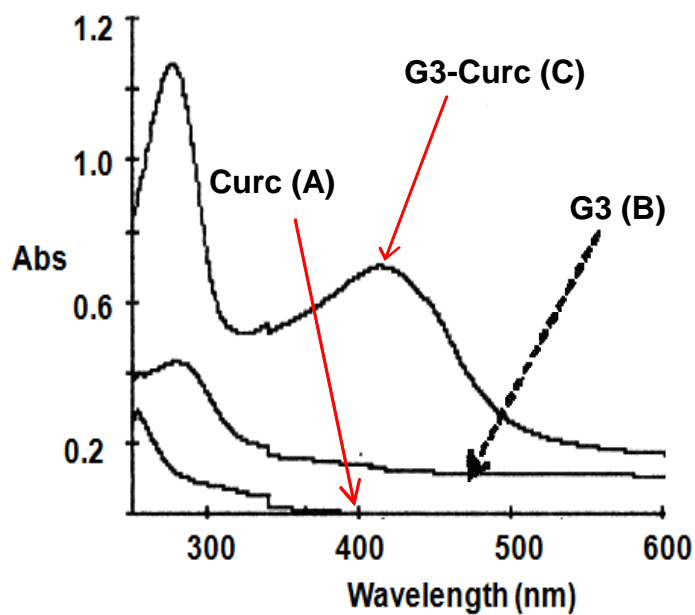

**Figure S3:** Absorption spectra of curcumin **Curc (A)**, **G3-PAMAM (B)** and **G3-Curc (C)** conjugate respectively, in water.

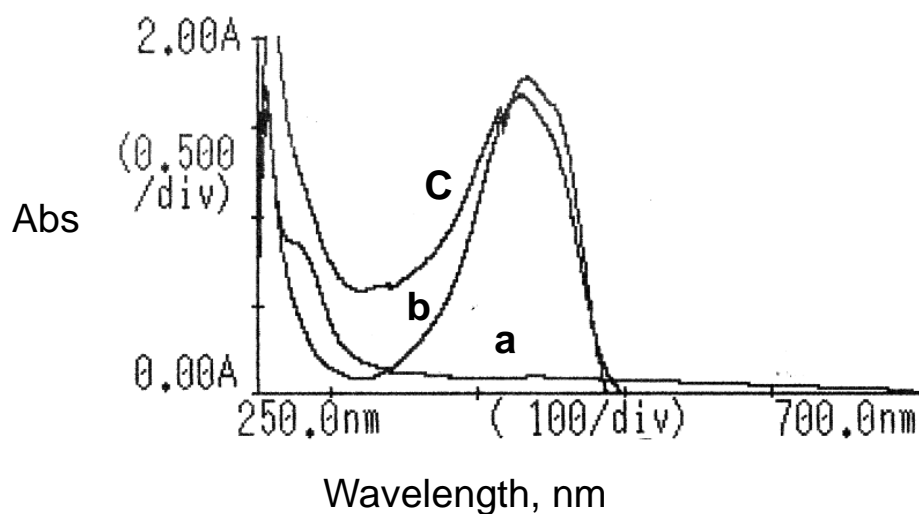

**Figure S4:** Absorption spectra of curcumin **G3-succinimic acid PAMAM (a)**, **Curc (b)**, and **G3-Curc (C)** conjugate respectively, in DMSO.

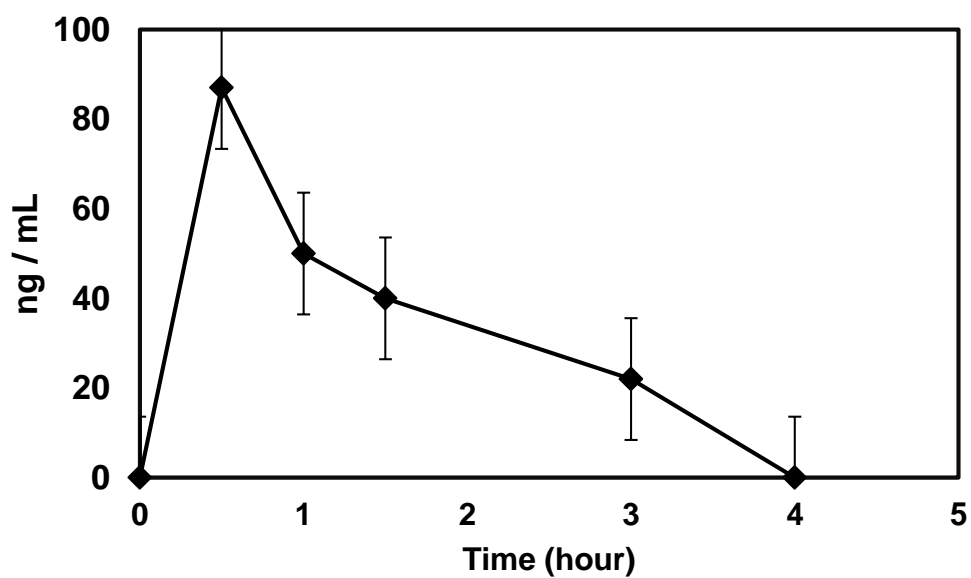

**Figure S5:** Bioavailability of **G3-Curc** in mice. **G3-Curc** (100 mg/kg) was administered to mice by intravenously. The mice were sacrificed 0.5, 1, 1.5, 3 and 4 hours (n=3/time point and number of experiment, n=1) later by euthanasia, the blood was collected by heart puncture, and the serum was separated by centrifugation at 14000 rpm for 2 min. HPLC analysis of serum are depicted in the figure.
